1           Wastewater based epidemiology beyond SARS-  
2           CoV-2: Spanish wastewater reveals the current  
3           spread of Monkeypox virus

4       Inés Girón-Guzmán<sup>1</sup>, Azahara Díaz-Reolid<sup>1</sup>, Pilar Truchado<sup>2</sup>, Albert Carcereny<sup>3</sup>, David  
5       Garcia-Pedemonte<sup>3</sup>, Bruno Hernaez<sup>4</sup>, Albert Bosch<sup>3</sup>, Rosa María Pintó<sup>3</sup>, Susana Guix<sup>3</sup>,  
6       Ana Allende<sup>2</sup>, Antonio Alcamí<sup>4</sup>, Alba Pérez-Cataluña<sup>1\*</sup>, Gloria Sánchez<sup>1\*</sup>.

7       <sup>1</sup>VISAFELab, Department of Preservation and Food Safety Technologies, Institute of  
8       Agrochemistry and Food Technology, IATA-CSIC, Av. Agustín Escardino 7, Paterna,  
9       Valencia 46980, Spain.

10      <sup>2</sup>Department of Food Science and Technology, CEBAS-CSIC, Research Group on  
11      Quality and Safety of Fruits and Vegetables, Campus Universitario de Espinardo, 25,  
12      Murcia 30100, Spain.

13      <sup>3</sup>Enteric Virus Laboratory, Department of Genetics, Microbiology, and Statistics,  
14      Section of Microbiology, Virology, and Biotechnology, School of Biology, University  
15      of Barcelona, Barcelona, Spain

16      <sup>4</sup>Molecular Biology Center Severo Ochoa, CSIC-UAM, Campus de Cantoblanco,  
17      Nicolás Cabrera 1, 28049 Madrid, Spain.

18  
19      \*Co-Correspondence: Alba Pérez-Cataluña ([alba.perez@iata.csic.es](mailto:alba.perez@iata.csic.es)), Gloria Sánchez  
20      ([gloriasanchez@iata.csic.es](mailto:gloriasanchez@iata.csic.es))

21      Avda. Catedrático Agustín Escardino 7, Paterna (46980), Spain

22  
23  
24  
25  
26  
27  
28      Keywords: monkeypox; wastewater; epidemiology; WBE

31 **Summary**

32 Besides nasopharyngeal swabs, monkeypox virus (MPXV) DNA has been detected in a  
33 variety of samples such as saliva, semen, urine and fecal samples. Using the  
34 environmental surveillance network previously developed in Spain for the routine  
35 wastewater surveillance of SARS-CoV-2 (VATar COVID-19), we have analyzed the  
36 presence of MPXV DNA in wastewater from different areas of Spain. Samples (n=312)  
37 from 24 different wastewater treatment plants were obtained between May 9 (week  
38 22\_19) and August 4 (week 22\_31), 2022. Following concentration of viral particles by  
39 flocculation, a qPCR procedure allowed us to detect MPXV DNA in 63 wastewater  
40 samples collected from May 16 to August 4, 2022, with values ranging between  $2.2 \times$   
41  $10^3$  to  $8.7 \times 10^4$  genome copies (gc)/L. This study shows that MPXV DNA can be  
42 reproducibly detected by qPCR in longitudinal samples collected from different Spanish  
43 wastewater treatment plants. According to data from the National Epidemiological  
44 Surveillance Network (RENAVE) in Spain a total of 6,119 cases have been confirmed  
45 as of August 19, 2022. However, and based on the wastewater data, the reported clinical  
46 cases seem to be underestimated and asymptomatic infections may be more frequent  
47 than expected.

48

49

50

51

52

53

54

55

56

57

58

## 59 **1. Introduction**

60 In early May 2022, a multi-country outbreak of Monkeypox virus (MPXV) started in  
61 non-endemic regions, and on 23 July WHO declared a Public Health emergency of  
62 international concern (WHO, 2022). In Europe, a total of 13,911 cases of MPX have  
63 been reported up to 19 August 2022, with Spain accounting for 6,119 cases, the second  
64 highest number of monkeypox (MPX) cases worldwide, being present in most regions  
65 of the country (Spanish Ministry of Health, 2022).

66 Symptoms developed include the appearance of rash, fever, fatigue, muscle pain,  
67 vomiting, diarrhea, chills, sore throat or headache, and the hospitalization rate is around  
68 8-13% (European Centre for Disease Prevention and Control (ECDC), 2022.; Thornhill  
69 et al., 2022). Sadly, two deaths linked to this outbreak have occurred in Spain due to  
70 complications associated with encephalitis (Aguilera-Alonso et al., 2022). It is assumed  
71 that transmission occurs after close contact with skin lesions of an infected person, as  
72 well as through contact with respiratory droplets and fomites, and that infection is  
73 symptomatic in all patients (McCollum and Damon, 2014). However, antibodies have  
74 been found in exposed asymptomatic individuals, which can be linked to subclinical  
75 infections (Wilson et al., 2014), and positive MPXV PCR results from anal samples in  
76 asymptomatic men who have sex with men (MSM) have also been documented  
77 (Baetselier et al., 2022; Ferré et al., 2022). The virus is also excreted in fluids, and its  
78 detection in saliva, semen, urine and feces has been reported (Peiró-Mestres et al.,  
79 2022). This implies that routine wastewater surveillance can be applied as a tool for  
80 early detection of the disease expansion as very recently reported according a model-  
81 based theoretical evaluation (Chen and Bibby, 2022). According with this model,  
82 wastewater-based epidemiology (WBE) can detect on average 7 MPX cases out of  
83 100,000 people. Currently, various studies detected MPXV DNA in wastewater  
84 worldwide (de Jonge et al., 2022; la Rosa et al., 2022; Wolfe et al., 2022), highlighting  
85 again wastewater analysis as a non-invasive tool for monitoring the status and trend an  
86 emerging infection. The aim of the present study was to trace the community circulation  
87 of the MPXV from potentially symptomatic, asymptomatic, or presymptomatic  
88 individuals using the previous established Spanish National SARS-CoV-2 Wastewater  
89 Surveillance Network (VATar COVID-19).

90

91

## 92 **2. Material and methods**

### 93 **2.1. Sample concentration and DNA extraction**

94 Grab sewage samples were collected from 24 Spanish wastewater treatment plants  
95 (WWTPs) (Fig. 1C) between May 9 (week 22\_19) and August 4 (week 22\_31) and kept  
96 at 4°C until analysis. Concentration of viral fraction was performed with a previously  
97 validated method for SARS-CoV-2 using an aluminum-based adsorption precipitation  
98 procedure (Pérez-Cataluña et al., 2021). Nucleic acids extraction of the concentrated  
99 samples was performed with the Maxwell® RSC Instrument (Promega) using the  
100 Maxwell RSC Pure Food GMO and authentication kit (Promega) and the “Maxwell  
101 RSC Viral total Nucleic Acid” program.

### 102 **2.2. MPXV real -time PCR assays**

103 The MPXV West Africa (G2R\_WA) assay (Li et al., 2010) was used to quantify MPXV  
104 DNA using the qPCR Premix Ex Taq™ kit (Takara Bio Inc). Additionally, a subset of  
105 samples (Table S1) was tested for MPXV DNA using the MPXV generic (G2R\_G)  
106 assay (Li et al., 2010). Undiluted and ten-fold diluted DNA was tested in duplicated.  
107 Positive control consisted in the nucleic acid material extracted from a cell culture  
108 infected with a clinical MPXV specimen obtained from a patient pustule. For each  
109 qPCR, serial dilutions of standard curves were run in quintuplicates and the numbers of  
110 estimated genome copies were calculated (Table S2). Each run included negative  
111 controls (nuclease-free water and negative extraction controls). Depending on the  
112 laboratory, reactions were carried out in the QuantStudio™ 3 and QuantStudio™ 5  
113 Real-Time PCR Systems (ThermoFisher Sci.)

## 114 **3. Results**

### 115 **3.1 Estimated levels of monkeypox virus DNA in wastewater samples**

116 Here, we report the first detection of MPXV DNA in wastewater samples from different  
117 regions of Spain. 63 out of 312 samples showed positive results for MPXV DNA,  
118 corresponding to samples collected from week 22\_20 to week 22\_31. Cycle threshold  
119 values ranged between 44.3 and 34.5, corresponding to values from  $2.2 \times 10^3$  to  $8.7 \times$   
120  $10^4$  estimated genome copies (gc) per liter (Fig. 1A). First detection of MPXV DNA in  
121 wastewater samples occurred in WWTP13 from the city of Madrid in week 22\_20 (Fig.

122 1A and Fig. 2), with positive detection using two different assays (Table S1). On that  
123 week, Madrid reported the first suspected cases of MPX which represented the first  
124 cases of MPX in Spain accounting for one of the largest outbreaks reported outside  
125 Africa (Iñigo Martínez et al., 2022). Later on, several cases were reported in Madrid  
126 before the outbreak declaration on 17 May, most of them attending the same sauna in  
127 the city of Madrid or with travel history to Maspalomas Gay Pride festival that took  
128 place on 5-15 May in Gran Canaria.

129 In week 22\_21, MPXV DNA was detected in the closest WWTPs of Madrid city  
130 (WWTP12 and WWTP13) and in WWTP20 of Gran Canaria (Canary Islands) (Fig. 1,  
131 Table S1). Interestingly, we consistently detected MPXV DNA in samples collected  
132 from week 22\_23 in WWTP12 and WWTP13 from Madrid, when only 275 cumulative  
133 cases were declared in the entire Region (Iñigo Martínez et al., 2022). Our data also  
134 showed percentages of WWTPs with MPXV DNA detection increased progressively,  
135 up to 15% by week 22\_23 and 45% by week 22\_26 (Fig. 1A and Fig. 2). In Barcelona,  
136 the second largest Spanish city, first detection occurred in week 22\_23 in WWTP18  
137 with the first peak observed in week 22\_26 when 130 cumulative cases were detected in  
138 Catalonia (Fig. 2). Intermittent detection (negative results after previous qPCR  
139 detection) was reported from some WWTPs where the number of confirmed clinical  
140 cases was low (Fig. 1 and Fig. 2). Furthermore, all weekly samples collected from  
141 Valencia (WWTP21), Extremadura (WWTP23 and WWTP24), and Navarra  
142 (WWTP22) tested negative for the presence of MPXV DNA (Fig. 2), with a total  
143 number of clinical cases of 331, 21 and 13 as August 9, respectively (Spanish Ministry  
144 of Health, 2022).

#### 145 **4. Discussion**

146 The COVID-19 pandemic has demonstrated that WBE is a cost-effective tool to  
147 anticipate the circulation of SARS-CoV-2 in a community and to closely track its  
148 incidence, evolution and geographic spread (Bivins et al., 2020). WBE has been  
149 implemented worldwide and most of the countries are ready to perform this monitoring  
150 as a routing basis for other emerging pathogens likely to be found in wastewater, due to  
151 their presence in feces and/or urine. In Spain, the National WBE Network, VATar  
152 COVID-19, has been successfully used to determine the extent of the COVID-19  
153 disease along the country (Carcereny et al., 2021).

154 The increasing number of MPXV cases around the world continue to pose challenges to  
155 control its transmission with a total number of 41,358 cases as of 19 Aug 2022 (CDC,  
156 2022). This underscores the urgent needs for simple and cost-effective tools to facilitate  
157 early detection, evolution and spatial distribution of cases. DNA of MPXV has been  
158 detected in urine and feces from symptomatic individuals (Antinori et al., 2022; Peiró-  
159 Mestres et al., 2022), and although limited data are available, viral shedding has been  
160 observed in stool in 63 % of patients (Cts values from 17.8 to 31.4) and in urine in 56%  
161 (Cts values from 19.1 to 40.0) (Peiró-Mestres et al., 2022). It is not known whether  
162 MPXV present in stool and urine is infectious. Altogether, these findings warned the  
163 interest of assessing the presence of MPXV DNA in sewage samples (Chen and Bibby,  
164 2022). In the current study, a qPCR assay designed for the West African clade (Li et al.,  
165 2010) was applied on wastewater samples collected from week 22\_19 to week 22\_31,  
166 showing that MPXV DNA can be reproducibly detected by qPCR in longitudinal  
167 samples collected from several Spanish WWTPs. First detection of MPXV DNA was  
168 retrieved in a single sample from WWTP13 collected on May 17 (Week 22\_20) using  
169 the specific qPCR assay and confirmed by the MPXV generic assay, providing the  
170 earliest piece of evidence that the virus was circulating in the community of Madrid.  
171 Interestingly, we consistently detected MPXV DNA in samples collected in WWTP18  
172 (Barcelona) since week 22\_23, when only 39 cumulative cases were declared in the  
173 entire Autonomous Community of Catalonia. In line, MPXV DNA was also detected in  
174 week 22\_21 on wastewater samples collected from Schiphol Airport and in different  
175 Dutch WWTPs from week 22\_22 onwards (de Jonge et al., 2022).

176 The viral concentration method used in this study has been validated for SARS-CoV-2  
177 detection and quantification (Pérez-Cataluña et al., 2021) and it seems promising for  
178 MPXV monitoring in wastewater, too. However, in contrast to what has been reported  
179 for SARS-CoV-2 (Bivins et al., 2020; Medema et al., 2020; Randazzo et al., 2020),  
180 anticipation has not been observed for MPXV, for which the first wastewater detection  
181 occurred at the same time that MPXV cases were declared (Fig. 2). This could be due to  
182 several factors, including differences in shedding levels and kinetics, proportion of  
183 asymptomatic cases, diagnosis of the disease and fast identification of cases,  
184 environmental factors affecting virus stability, low performance of the method to  
185 concentrate MPXV, and also a much larger scale of transmission of SARS-CoV-2 in the  
186 community. Therefore, further assessment of the performance characteristics of the

187 methodology needs to be carried out. However, it is important to highlight that  
188 wastewater positive samples have been found in areas with very low reported disease  
189 prevalence. For instance, in Castilla la Mancha, a region located at the middle-south of  
190 Spain, MPXV was detected in sewage with only 42 clinical cases being reported,  
191 indicating that probably, a higher number of people may be affected. As previously  
192 discussed by other authors, stigma and discrimination may be limiting the awareness or  
193 willingness of at-risk people to have their symptoms evaluated. In these situations,  
194 WBE may be even more useful, because the anonymous pooled samples can evidence  
195 the contributions of a community without divulging individual identities (Nelson,  
196 2022).

197

## 198 **5. Conclusions**

199 Using an environmental surveillance tool previously developed for SARS-CoV-2, we  
200 have been able to consistently detect MPXV DNA in wastewater samples from different  
201 regions of Spain when communicated clinical cases in that region were only incipient.  
202 We also found that the wastewater viral DNA detection increased rapidly and  
203 anticipated the subsequent ascent in the number of declared cases showing, once again,  
204 that WBE is a sensitive and cost-effective strategy for the surveillance emerging viral  
205 threats. In those cases where stigma and blame might undermine the capacity to  
206 effectively respond during outbreaks, i.e., driving people away from health services, the  
207 implementation of WBE may represent a most valuable tool.

## 208 **Acknowledgements**

209 This research was supported by the European Commission NextGenerationEU fund,  
210 through CSIC's Global Health Platform (PTI Salud Global) and samples were obtained  
211 from the COVID-19 wastewater surveillance project (VATar COVID-19) funded by the  
212 Spanish Ministry for the Ecological Transition and the Demographic Challenge and the  
213 Spanish Ministry of Health. IGG is recipient of a predoctoral contract from the  
214 Generalitat Valenciana (ACIF/2021/181) and AP-C was supported by a postdoctoral  
215 fellowship (APOSTD/2021/292). PT is holding a Ramón y Cajal contract from the  
216 Ministerio de Ciencia e Innovación and AC is recipient of a predoctoral contract FI-  
217 SDUR from the Generalitat de Catalunya.

218

219

## 220 **References**

221

- 222 Aguilera-Alonso, D., Alonso-Cadenas, J.A., Roguera-Sopena, M., Lorusso, N., Miguel, L.G.S.,  
223 Calvo, C., 2022. Monkeypox virus infections in children in Spain during the first months of  
224 the 2022 outbreak. *Lancet Child Adolesc Health*. [https://doi.org/10.1016/S2352-](https://doi.org/10.1016/S2352-4642(22)00250-4)  
225 [4642\(22\)00250-4](https://doi.org/10.1016/S2352-4642(22)00250-4)
- 226 Antinori, A., Mazzotta, V., Vita, S., Carletti, F., Tacconi, D., Lapini, L.E., D’Abramo, A., Cicalini, S.,  
227 Lapa, D., Pittalis, S., Puro, V., Rivano Capparuccia, M., Giombini, E., Gruber, C.E.M.,  
228 Garbuglia, A.R., Marani, A., Vairo, F., Girardi, E., Vaia, F., Nicastri, E., 2022.  
229 Epidemiological, clinical and virological characteristics of four cases of monkeypox  
230 support transmission through sexual contact, Italy, May 2022. *Eurosurveillance* 27,  
231 2200421. <https://doi.org/10.2807/1560-7917.ES.2022.27.22.2200421/CITE/PLAINTEXT>
- 232 Baetselier, I. de, Dijck, C. van, Kenyon, C., Coppens, J., Bossche, D. van den, Smet, H.,  
233 Liesenborghs, L., Vanroye, F., Block, T. de, Rezende, A., Florence, E., Vercauteren, K.,  
234 Esbroeck, M. van, group, the M. study, 2022. Asymptomatic monkeypox virus infections  
235 among male sexual health clinic attendees in Belgium. *medRxiv* 2022.07.04.22277226.  
236 <https://doi.org/10.1101/2022.07.04.22277226>
- 237 Bivins, A., North, D., Ahmad, A., Ahmed, W., Alm, E., Been, F., Bhattacharya, P., Bijlsma, L.,  
238 Boehm, A.B., Brown, J., Buttiglieri, G., Calabro, V., Carducci, A., Castiglioni, S., Cetecioglu  
239 Gurol, Z., Chakraborty, S., Costa, F., Curcio, S., de Los Reyes, F.L., Delgado Vela, J., Farkas,  
240 K., Fernandez-Casi, X., Gerba, C., Gerrity, D., Girones, R., Gonzalez, R., Haramoto, E.,  
241 Harris, A., Holden, P.A., Islam, M.T., Jones, D.L., Kasprzyk-Hordern, B., Kitajima, M.,  
242 Kotlarz, N., Kumar, M., Kuroda, K., la Rosa, G., Malpei, F., Mautus, M., McLellan, S.L.,  
243 Medema, G., Meschke, J.S., Mueller, J., Newton, R.J., Nilsson, D., Noble, R.T., van Nuijs,  
244 A., Peccia, J., Perkins, T.A., Pickering, A.J., Rose, J., Sanchez, G., Smith, A., Stadler, L.,  
245 Stauber, C., Thomas, K., van der Voorn, T., Wigginton, K., Zhu, K., Bibby, K., 2020.  
246 Wastewater-Based Epidemiology: Global Collaborative to Maximize Contributions in the  
247 Fight against COVID-19. *Environ Sci Technol*. <https://doi.org/10.1021/acs.est.0c02388>
- 248 Carcereny, A., Martínez-Velázquez, A., Bosch, A., Allende, A., Truchado, P., Cascales, J.,  
249 Romalde, J.L., Lois, M., Polo, D., Sánchez, G., Pérez-Cataluña, A., Díaz-Reolid, A., Antón,  
250 A., Gregori, J., Garcia-Cehic, D., Quer, J., Palau, M., Ruano, C.G., Pintó, R.M., Guix, S.,  
251 2021. Monitoring Emergence of the SARS-CoV-2 B.1.1.7 Variant through the Spanish  
252 National SARS-CoV-2 Wastewater Surveillance System (VATar COVID-19). *Environ Sci*  
253 *Technol* 55, 11756–11766. <https://doi.org/10.1021/ACS.EST.1C03589>



- 254 CDC, 2022 Monkeypox Outbreak Global Map | Monkeypox | Poxvirus | CDC [WWW  
255 Document], n.d. URL [https://www.cdc.gov/poxvirus/monkeypox/response/2022/world-](https://www.cdc.gov/poxvirus/monkeypox/response/2022/world-map.html)  
256 [map.html](https://www.cdc.gov/poxvirus/monkeypox/response/2022/world-map.html) (accessed 8.3.22).
- 257
- 258 Chen, W., Bibby, K., 2022. Model-Based Theoretical Evaluation of the Feasibility of Using  
259 Wastewater-Based Epidemiology to Monitor Monkeypox. *Environ Sci Technol Lett.*  
260 <https://doi.org/10.1021/ACS.ESTLETT.2C00496>
- 261 de Jonge, E.F., Peterse, C.M., Koelewijn, J.M., van der Drift, A.-M.R., van der Beek, R.F.H.J.,  
262 Nagelkerke, E., Lodder, W.J., 2022. The detection of monkeypox virus DNA in wastewater  
263 samples in the Netherlands. *Science of The Total Environment* 852, 158265.  
264 <https://doi.org/10.1016/J.SCITOTENV.2022.158265>
- 265 European Centre for Disease Prevention and Control (ECDC), n.d. Factsheet for health  
266 professionals on monkeypox [WWW Document]. URL  
267 <https://www.ecdc.europa.eu/en/all-topics-z/monkeypox/factsheet-health-professionals>  
268 (accessed 8.3.22).
- 269 Ferré, V.M., Bachelard, A., Zaidi, M., Armand-Lefevre, L., Descamps, D., Charpentier, C., Ghosn,  
270 J., 2022. Detection of Monkeypox Virus in Anorectal Swabs From Asymptomatic Men  
271 Who Have Sex With Men in a Sexually Transmitted Infection Screening Program in Paris,  
272 France. <https://doi.org/10.7326/M22-2183>. <https://doi.org/10.7326/M22-2183>
- 273 Iñigo Martínez, J., Gil Montalbán, E., Jiménez Bueno, S., Martín Martínez, F., Nieto Juliá, A.,  
274 Sánchez Díaz, J., García Marín, N., Córdoba Deorador, E., Nunziata Forte, A., Alonso  
275 García, M., Humanes Navarro, A.M., Montero Morales, L., Domínguez Rodríguez, M.J.,  
276 Carbajo Ariza, M., Díaz García, L.M., Mata Pariente, N., Rumayor Zarzuelo, M., Velasco  
277 Rodríguez, M.J., Aragón Peña, A., Rodríguez Baena, E., Miguel Benito, Á., Pérez Meixeira,  
278 A., Ordobás Gavín, M., Lopaz Pérez, M.Á., Arce Arnáez, A., 2022. Monkeypox outbreak  
279 predominantly affecting men who have sex with men, Madrid, Spain, 26 April to 16 June  
280 2022. *Euro Surveill* 27, 2200471. [https://doi.org/10.2807/1560-](https://doi.org/10.2807/1560-7917.ES.2022.27.27.2200471)  
281 [7917.ES.2022.27.27.2200471/CITE/PLAINTEXT](https://doi.org/10.2807/1560-7917.ES.2022.27.27.2200471)
- 282 la Rosa, G., Mancini, P., Veneri, C., Ferraro, G.B., Lucentini, L., Iaconelli, M., Suffredini, E., 2022.  
283 Detection of Monkeypox virus DNA in the wastewater of an airport in Rome, Italy:  
284 expanding environmental surveillance to emerging threats. *medRxiv*  
285 2022.08.18.22278932. <https://doi.org/10.1101/2022.08.18.22278932>
- 286 Li, Y., Zhao, H., Wilkins, K., Hughes, C., Damon, I.K., 2010. Real-time PCR assays for the specific  
287 detection of monkeypox virus West African and Congo Basin strain DNA. *J Virol Methods*  
288 169, 223–227. <https://doi.org/10.1016/J.JVIROMET.2010.07.012>
- 289 McCollum, A.M., Damon, I.K., 2014. Human Monkeypox. *Clinical Infectious Diseases* 58, 260–  
290 267. <https://doi.org/10.1093/CID/CIT703>

- 291 Medema, G., Heijnen, L., Elsinga, G., Italiaander, R., Brouwer, A., 2020. Presence of SARS-  
292 Coronavirus-2 RNA in Sewage and Correlation with Reported COVID-19 Prevalence in the  
293 Early Stage of the Epidemic in The Netherlands. *Environ Sci Technol Lett* 7, 511–516.  
294 <https://doi.org/10.1021/acs.estlett.0c00357>
- 295 Nelson, B., 2022. What poo tells us: wastewater surveillance comes of age amid covid,  
296 monkeypox, and polio. *BMJ* 378, o1869. <https://doi.org/10.1136/BMJ.O1869>
- 297 Peiró-Mestres, A., Fuertes, I., Camprubí-Ferrer, D., Marcos, M.Á., Vilella, A., Navarro, M.,  
298 Rodríguez-Elena, L., Riera, J., Català, A., Martínez, M.J., Blanco, J.L., Hospital Clinic de  
299 Barcelona Monkeypox Study Group, 2022. Frequent detection of monkeypox virus DNA in  
300 saliva, semen, and other clinical samples from 12 patients, Barcelona, Spain, May to June  
301 2022. *Euro Surveill* 27, 2200503. [https://doi.org/10.2807/1560-](https://doi.org/10.2807/1560-7917.ES.2022.27.28.2200503/CITE/PLAINTEXT)  
302 [7917.ES.2022.27.28.2200503/CITE/PLAINTEXT](https://doi.org/10.2807/1560-7917.ES.2022.27.28.2200503/CITE/PLAINTEXT)
- 303 Pérez-Cataluña, A., Cuevas-Ferrando, E., Randazzo, W., Falcó, I., Allende, A., Sánchez, G., 2021.  
304 Comparing analytical methods to detect SARS-CoV-2 in wastewater. *Sci Total Environ*  
305 758. <https://doi.org/10.1016/J.SCITOTENV.2020.143870>
- 306 Spanish Ministry of Health, 2022. Alert on monkeypox infection in Spain and other non-  
307 endemic countries [WWW Document]. URL  
308 [https://www.sanidad.gob.es/profesionales/saludPublica/ccayes/alertasActual/alertaMon-](https://www.sanidad.gob.es/profesionales/saludPublica/ccayes/alertasActual/alertaMonkeypox/home.htm)  
309 [keypox/home.htm](https://www.sanidad.gob.es/profesionales/saludPublica/ccayes/alertasActual/alertaMonkeypox/home.htm) (accessed 8.19.22).
- 310 Randazzo, W., Truchado, P., Cuevas-Ferrando, E., Simón, P., Allende, A., Sánchez, G., 2020.  
311 SARS-CoV-2 RNA in wastewater anticipated COVID-19 occurrence in a low prevalence  
312 area. *Water Res* 181, 115942. <https://doi.org/10.1016/j.watres.2020.115942>
- 313 Thornhill, J.P., Barkati, S., Walmsley, S., Rockstroh, J., Antinori, A., Harrison, L.B., Palich, R.,  
314 Nori, A., Reeves, I., Habibi, M.S., Apea, V., Boesecke, C., Vandekerckhove, L., Yakubovskiy,  
315 M., Sendagorta, E., Blanco, J.L., Florence, E., Moschese, D., Maltez, F.M., Goorhuis, A.,  
316 Pourcher, V., Migaud, P., Noe, S., Pintado, C., Maggi, F., Hansen, A.-B.E., Hoffmann, C.,  
317 Lezama, J.I., Mussini, C., Cattelan, A., Makofane, K., Tan, D., Nozza, S., Nemeth, J., Klein,  
318 M.B., Orkin, C.M., SHARE-net Clinical Group, 2022. Monkeypox Virus Infection in Humans  
319 across 16 Countries - April-June 2022. *N Engl J Med*.  
320 [https://doi.org/10.1056/NEJMOA2207323/SUPPL\\_FILE/NEJMOA2207323\\_](https://doi.org/10.1056/NEJMOA2207323/SUPPL_FILE/NEJMOA2207323_DATA-SHARING.PDF)  
321 [DATA-](https://doi.org/10.1056/NEJMOA2207323/SUPPL_FILE/NEJMOA2207323_DATA-SHARING.PDF)  
[SHARING.PDF](https://doi.org/10.1056/NEJMOA2207323/SUPPL_FILE/NEJMOA2207323_DATA-SHARING.PDF)
- 322 WHO Director-General declares the ongoing monkeypox outbreak a Public Health Emergency  
323 of International Concern [WWW Document], n.d. URL  
324 [https://www.who.int/europe/news/item/23-07-2022-who-director-general-declares-the-](https://www.who.int/europe/news/item/23-07-2022-who-director-general-declares-the-ongoing-monkeypox-outbreak-a-public-health-event-of-international-concern)  
325 [ongoing-monkeypox-outbreak-a-public-health-event-of-international-concern](https://www.who.int/europe/news/item/23-07-2022-who-director-general-declares-the-ongoing-monkeypox-outbreak-a-public-health-event-of-international-concern) (accessed  
326 9.6.22).
- 327 Wilson, M.E., Hughes, J.M., McCollum, A.M., Damon, I.K., 2014. Human monkeypox. *Clinical*  
328 *Infectious Diseases* 58, 260–267. <https://doi.org/10.1093/cid/cit703>

329 Wolfe, M.K., Duong, D., Hughes, B., Chan-Herur, V., White, B.J., Boehm, A.B., Wolfe, M.K.,  
330 Boehm, A., 2022. Detection of monkeypox viral DNA in a routine wastewater monitoring  
331 program. medRxiv 2022.07.25.22278043. <https://doi.org/10.1101/2022.07.25.22278043>

332

333

334

335 **Figure 1. A)** Evolution of MPXV DNA prevalence over time, as measured by qPCR in  
336 wastewater samples from 20 wastewater treatment plants with positive detection **B)**  
337 Number of cases of monkeypox per week (Spanish Ministry of Health) **C)** Geographical  
338 localization of wastewater treatment plants, dark blue (Autonomous Community with  
339 positive detection in the analyzed wastewater samples) and light blue (no detection in  
340 wastewater samples).

341

342

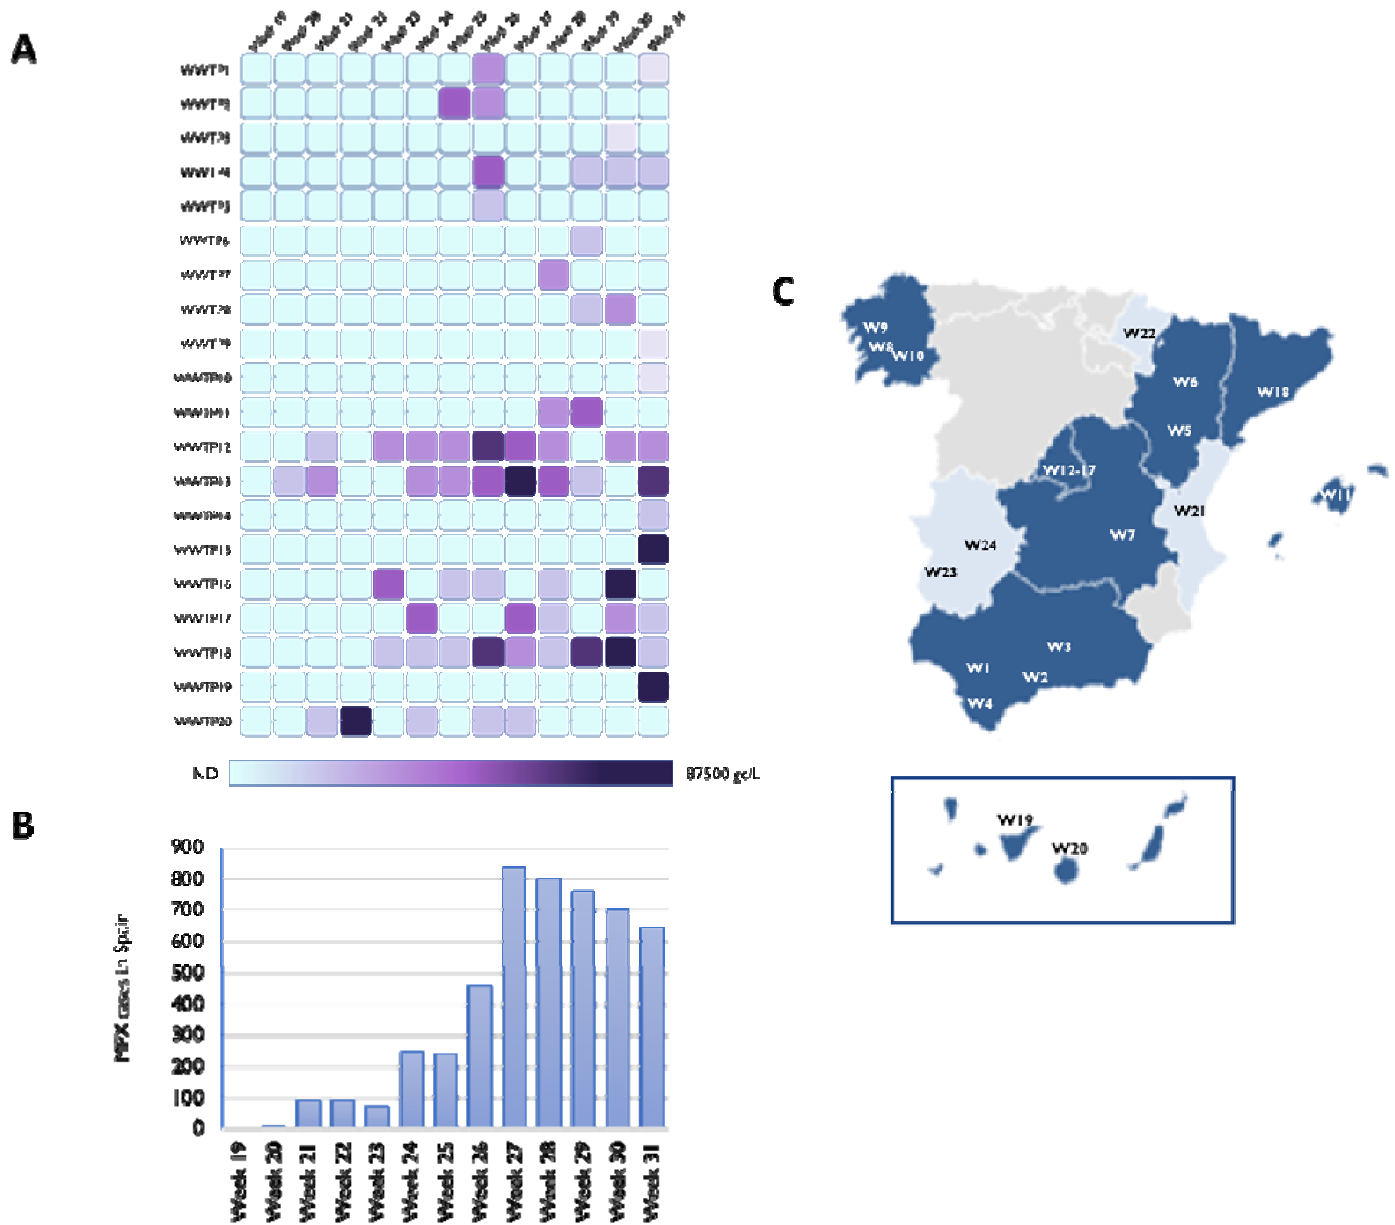

343

344

345 **Figure 2.** Comparison of MPXV DNA estimates from wastewater testing (left panels)  
 346 and confirmed cases of monkeypox by Autonomous community reported by the Health  
 347 Ministry authorities (right panels). For wastewater samples, highest level within the  
 348 same Autonomous Community are depicted. ND: No detection

349

350

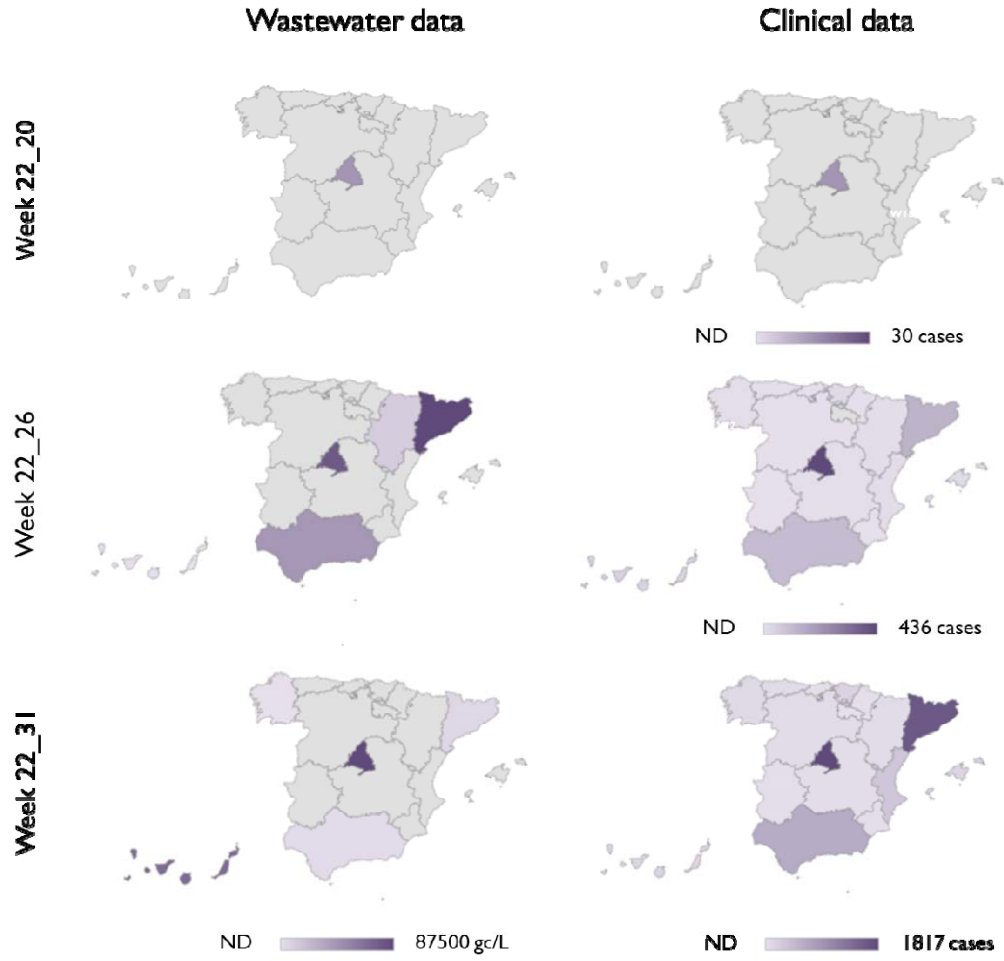

351

352

353

354

355

356
